# Supplementary material for: RNA Sequencing Identifies New RNase III Cleavage Sites in Escherichia coli and Reveals Increased Regulation of mRNA
Source: PubMed Central journal article supplement (PMC5371410; doi:10.1128/mbio.00128-17), 2017-03-28

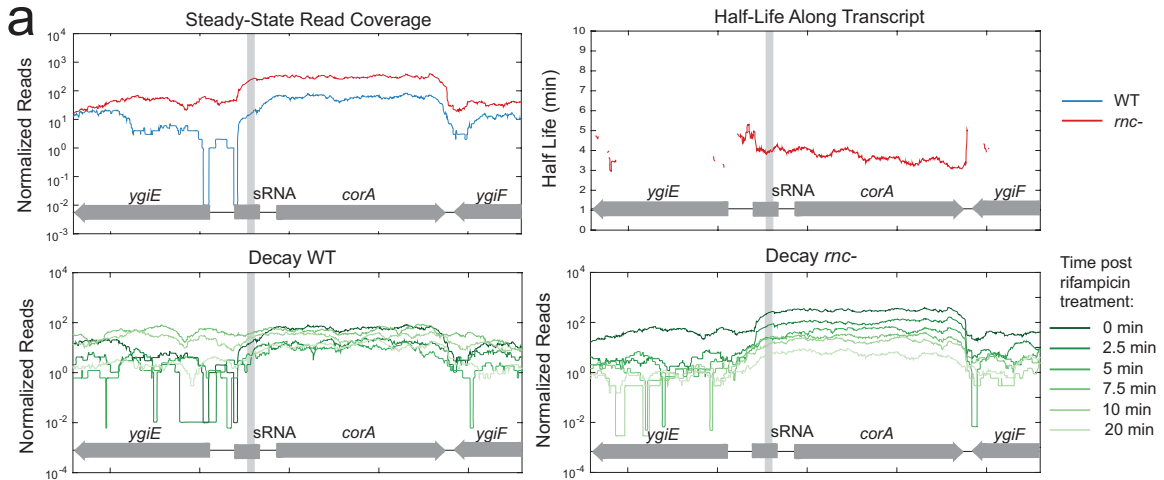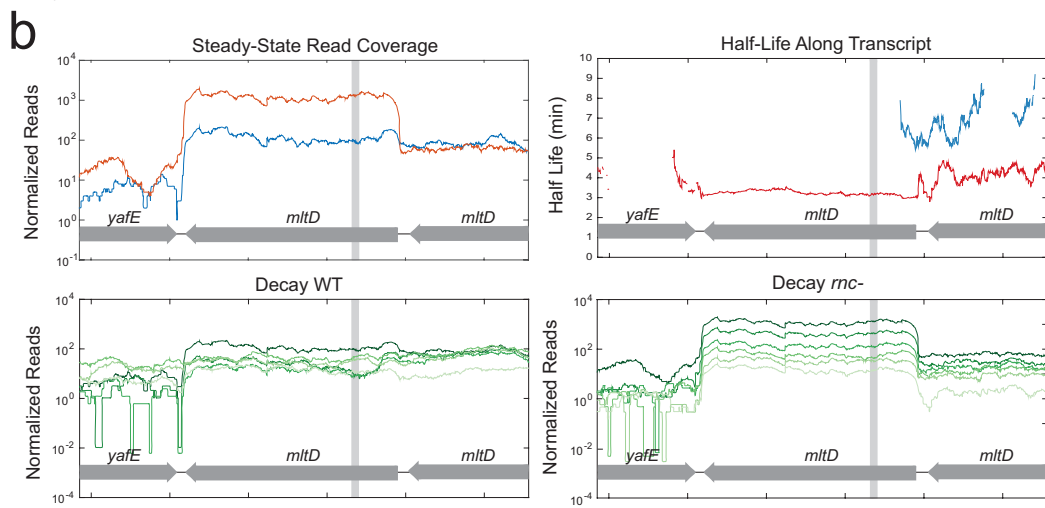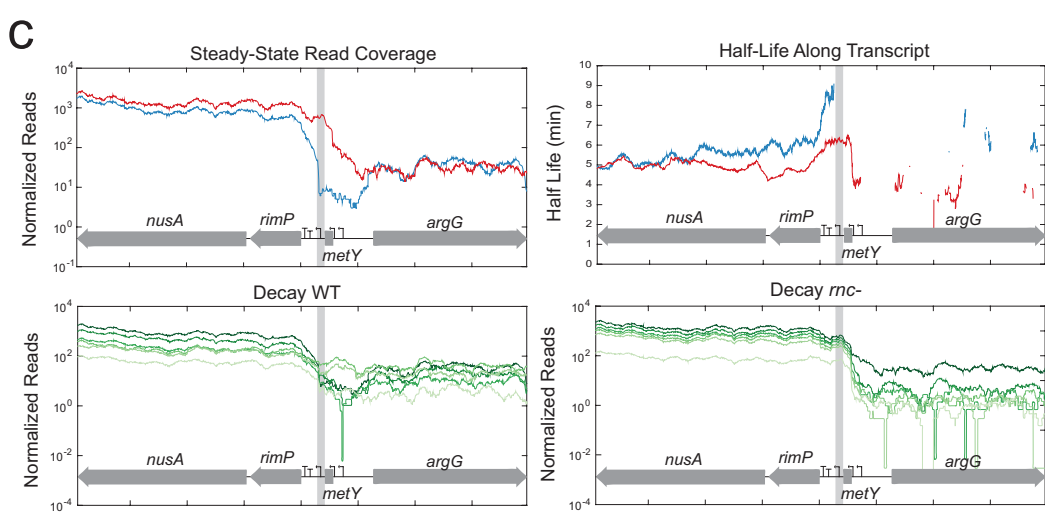

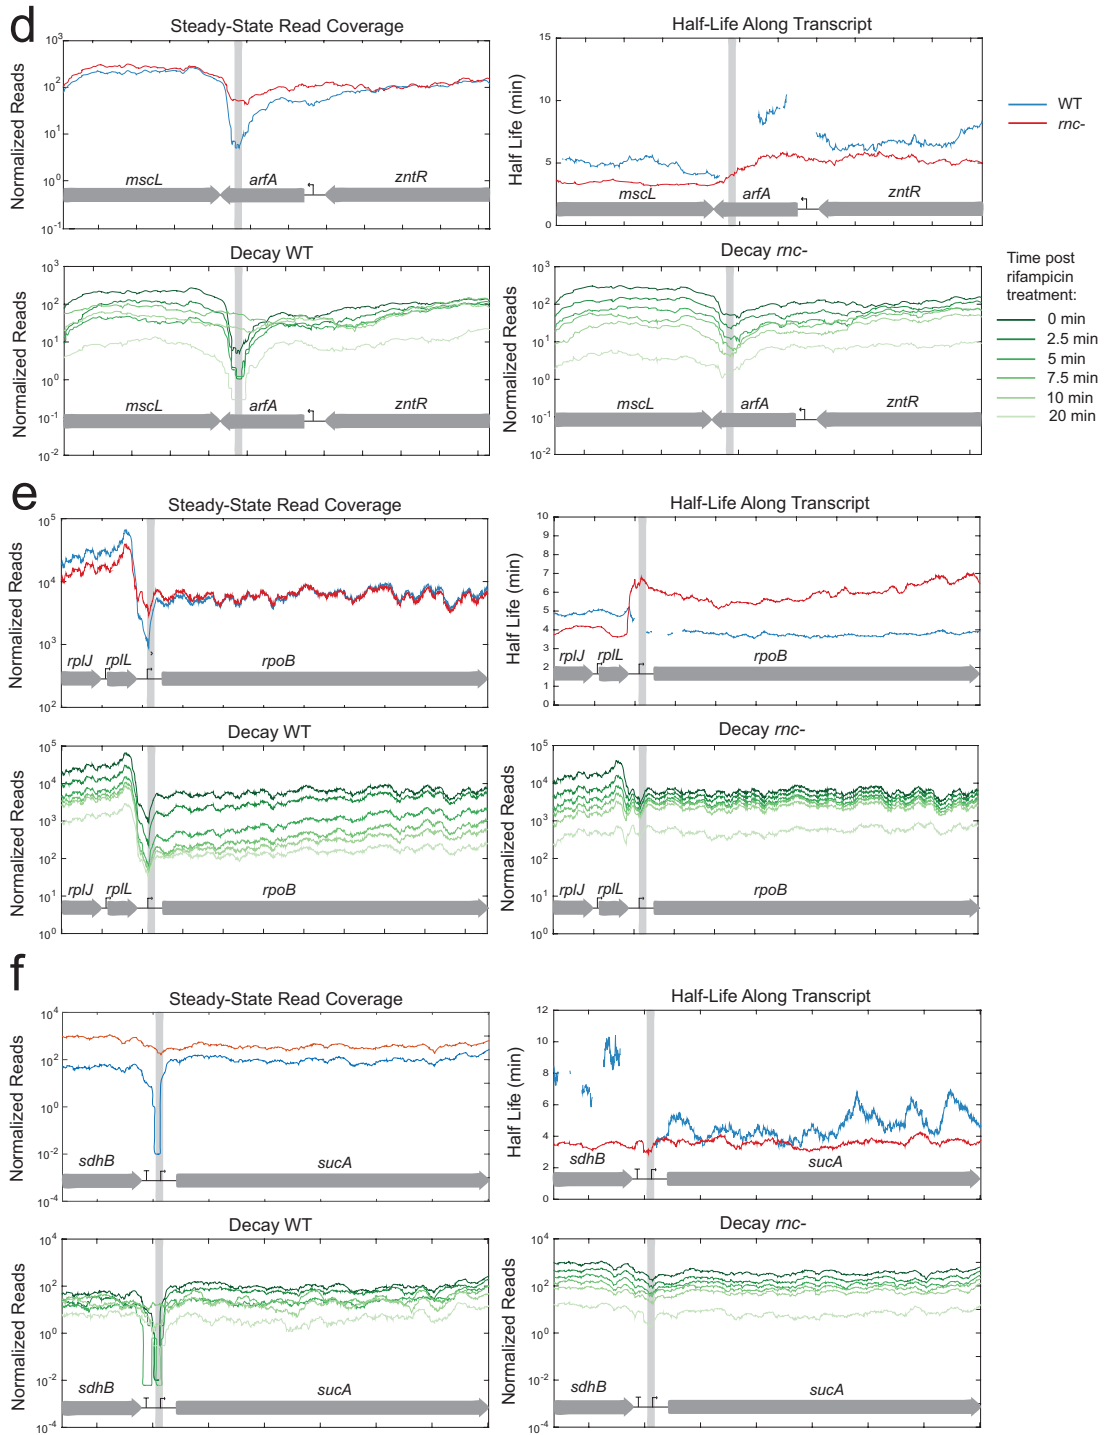

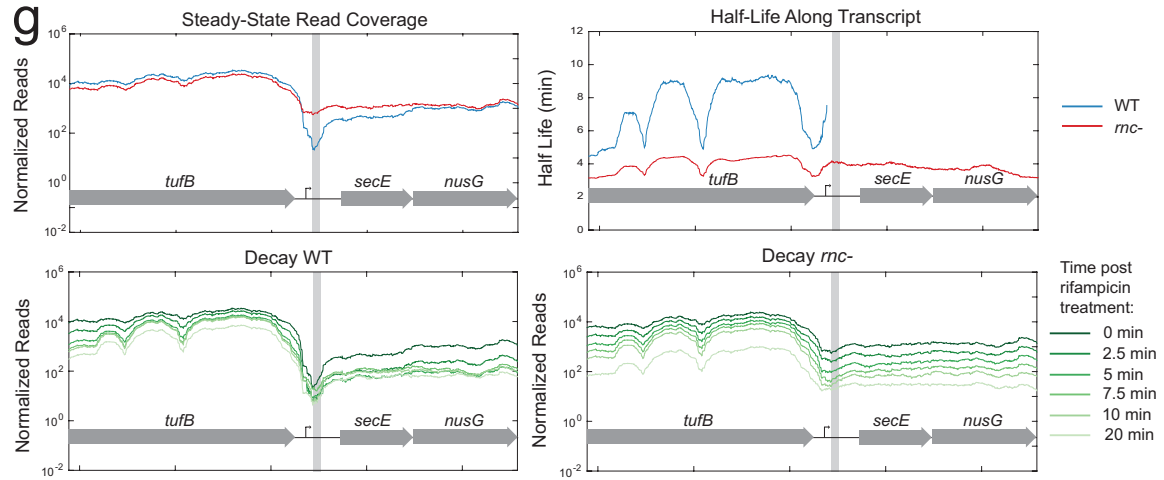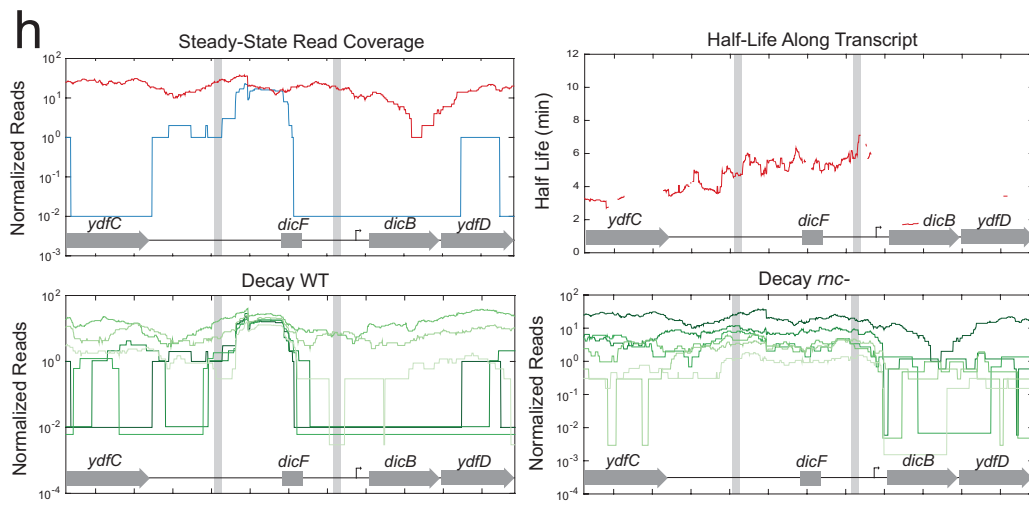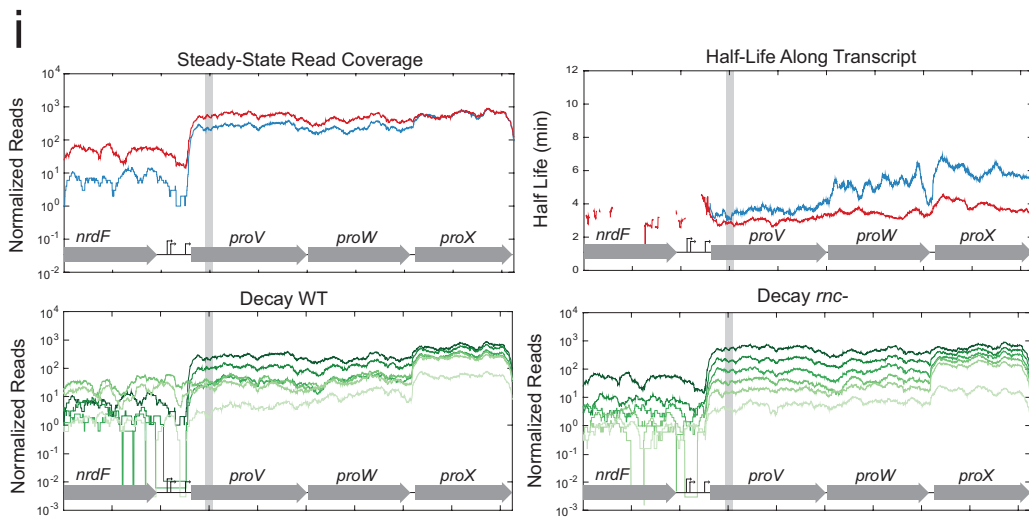

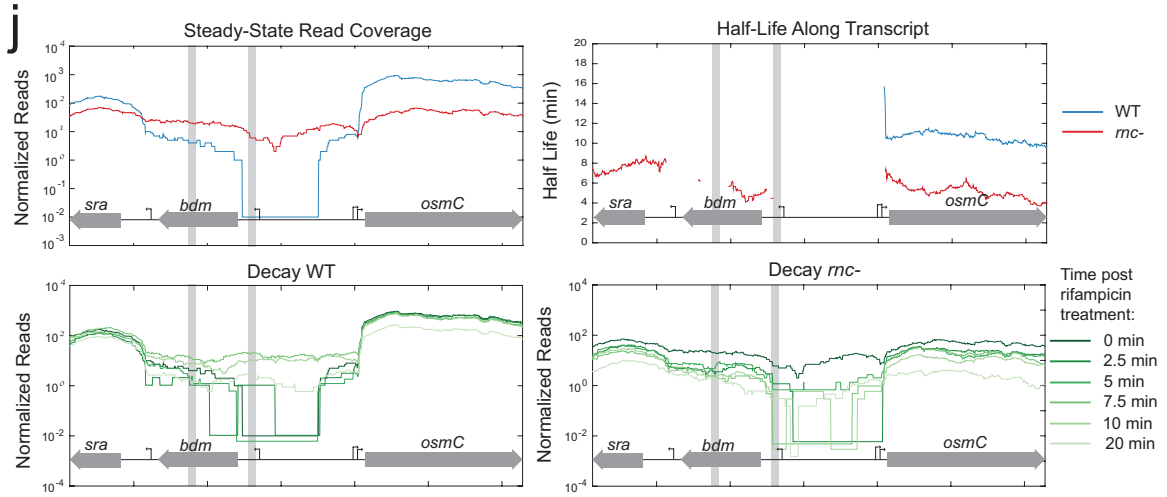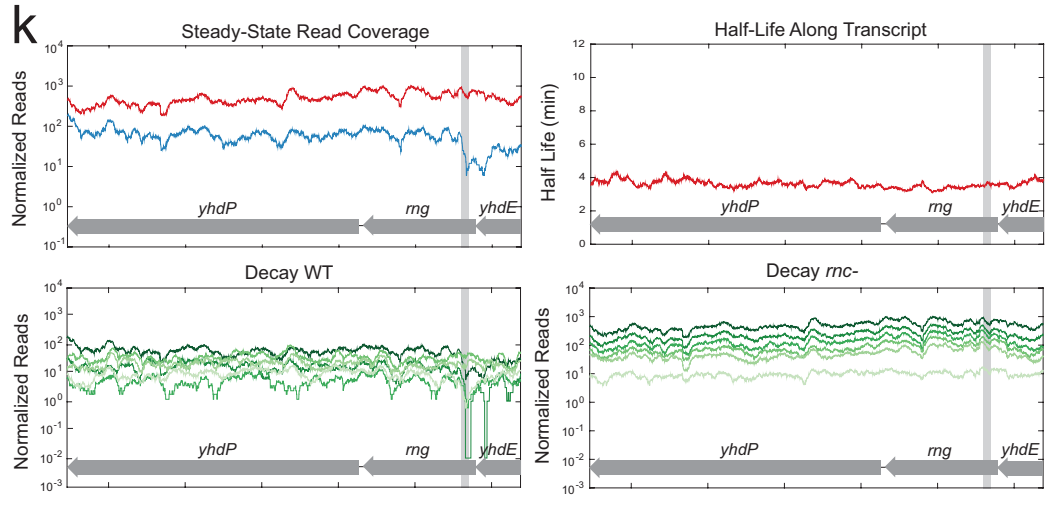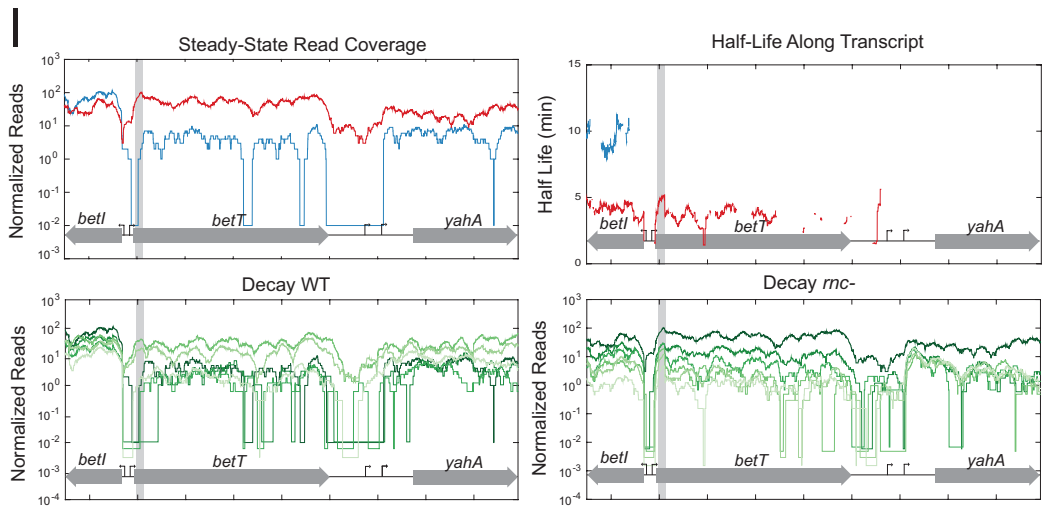

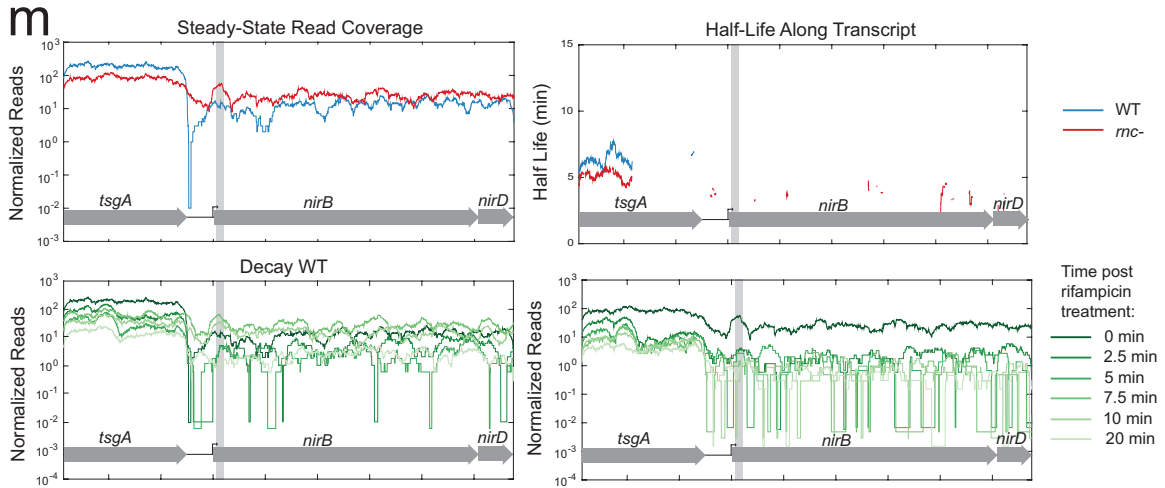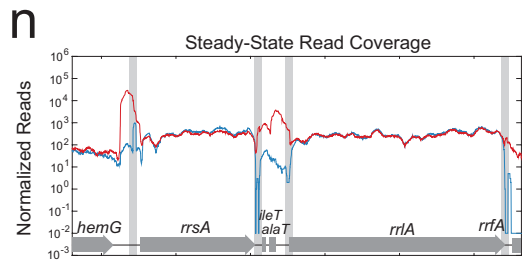

Supplement: mbo002173260sf1.pdf [file mbo002173260sf1.pdf]
